# Supplementary material
Source: publisher site journal article supplement (https://www.spandidos-publications.com/1980/downloadSupplementary)
Supplement: Supplementary file 1 [file downloadSupplementary]

Table SI. Five-year DFS and OS rates according to different variables in patients with resectable breast cancer.

| Variable    | 5-year DFS (%) | P-value | 5-year OS (%) | P-value |
|-------------|----------------|---------|---------------|---------|
| NLR         |                | <0.001  |               | <0.001  |
| Low         | 96.9           |         | 99.1          |         |
| High        | 78.7           |         | 83.1          |         |
| Fibrinogen  |                | <0.001  |               | <0.001  |
| Low         | 91.5           |         | 94.1          |         |
| High        | 80.6           |         | 86.0          |         |
| F-NLR score |                | <0.001  |               | <0.001  |
| 0           | 95.7           |         | 97.8          |         |
| 1           | 87.5           |         | 90.9          |         |
| 2           | 74.0           |         | 79.9          |         |

Kaplan-Meier method was used to calculate the 5-year DFS and OS rates in each group, and the log-rank test was used to compare rates between or among the groups. NLR, neutrophil-to-lymphocyte ratio; F-NLR, combination of fibrinogen concentration and NLR; DFS, disease-free survival; OS, overall survival.
